# Supplementary material
Source: publisher site journal article supplement (https://www.dovepress.com/article/354821)
Supplement: Supplementary file 1 [file get_supplementary_file.php]

**Derivation and validation a risk model for acute kidney injury and subsequent adverse events after cardiac surgery: a multicenter cohort study**

**Supplementary Material**

**Figure 1** Flowchart showing patients included in the analysis

**Figure 2** Comparison of model performance between the nomogram and other five

conventional scoring systems

**Figure 3** Risk stratification by the score generated from the nomogram

**Table 1** Variable definition in the database

**Table 2** Clinical characteristics of derivation and validation cohort

**Table 3** Clinical characteristics of patients in the derivation and validation cohorts who did or did not develop acute kidney injury after cardiac surgery

**Table 4** Detailed comparison between nomogram and other five conventional scoring systems

**Table 5** Percentage of patients in risk category

**
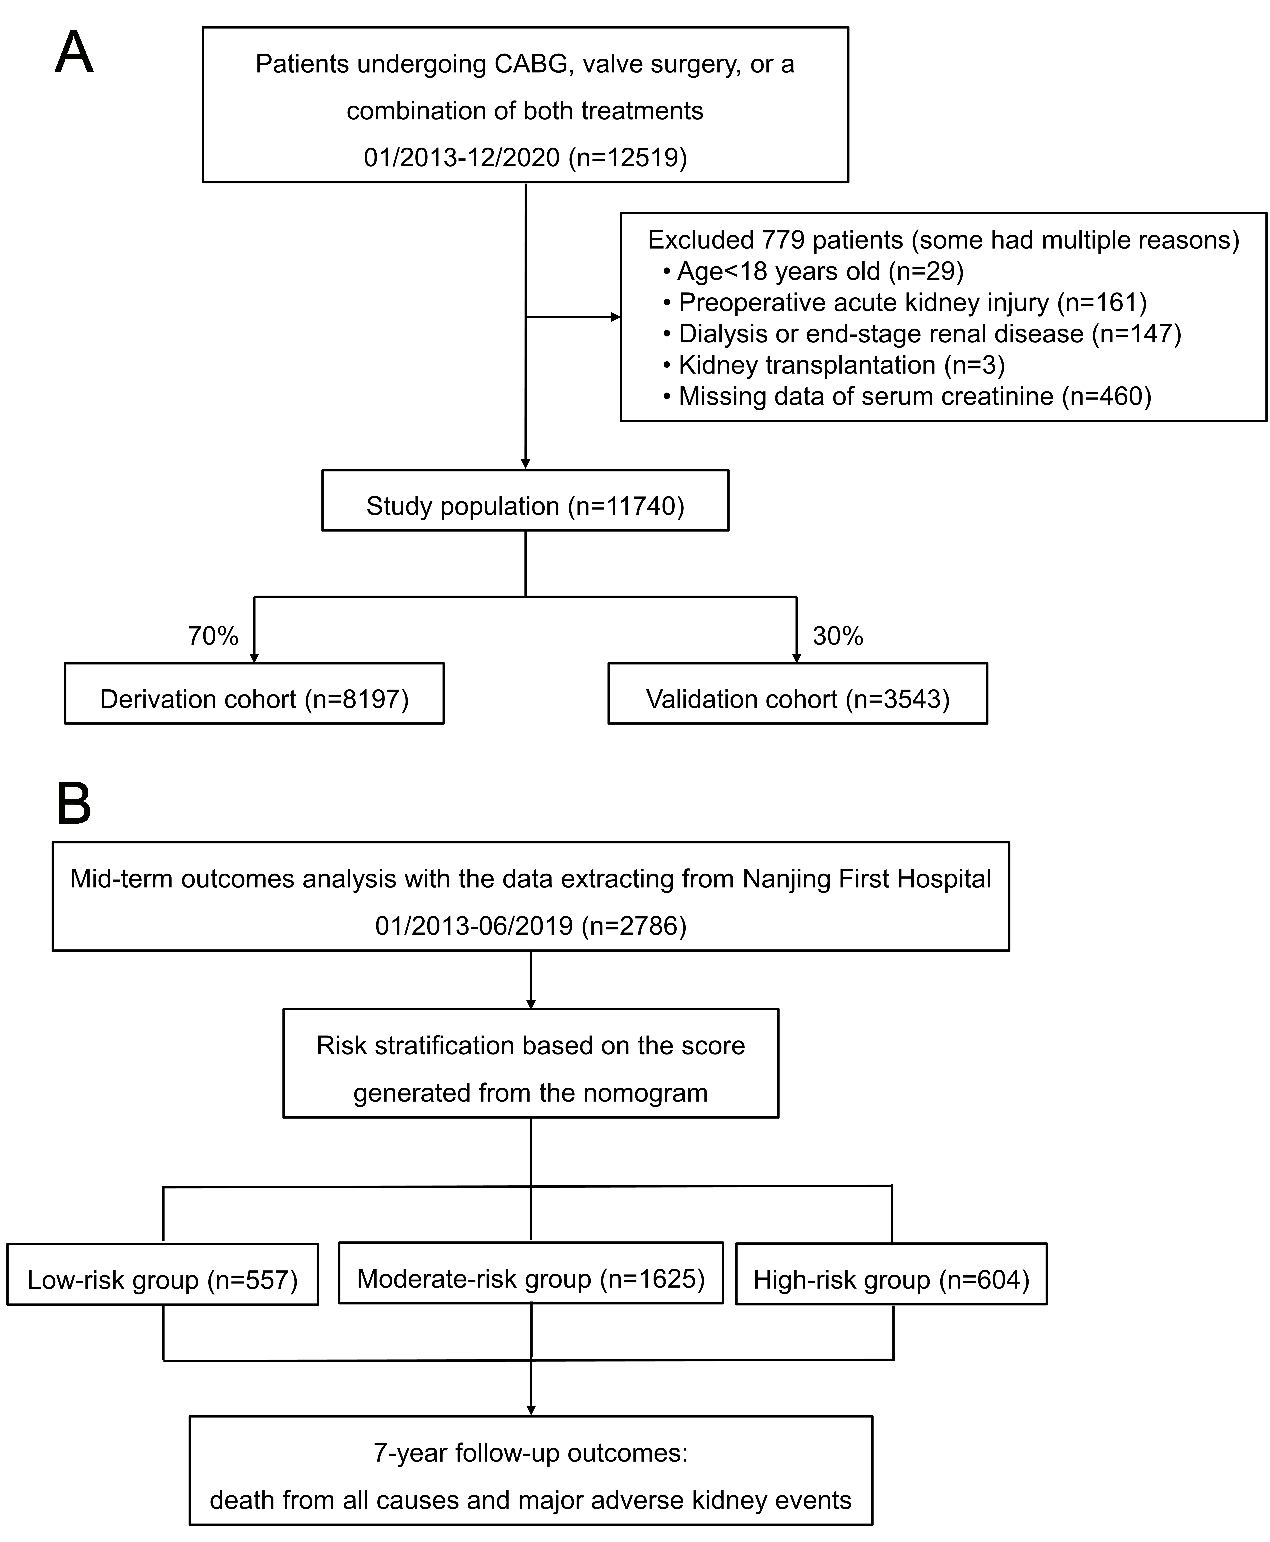
**

**Figure 1** Flowchart showing patients included in the analysis. (**A**) formation of derivation and validation cohorts; (**B**) mid-term analysis by risk-stratified groups


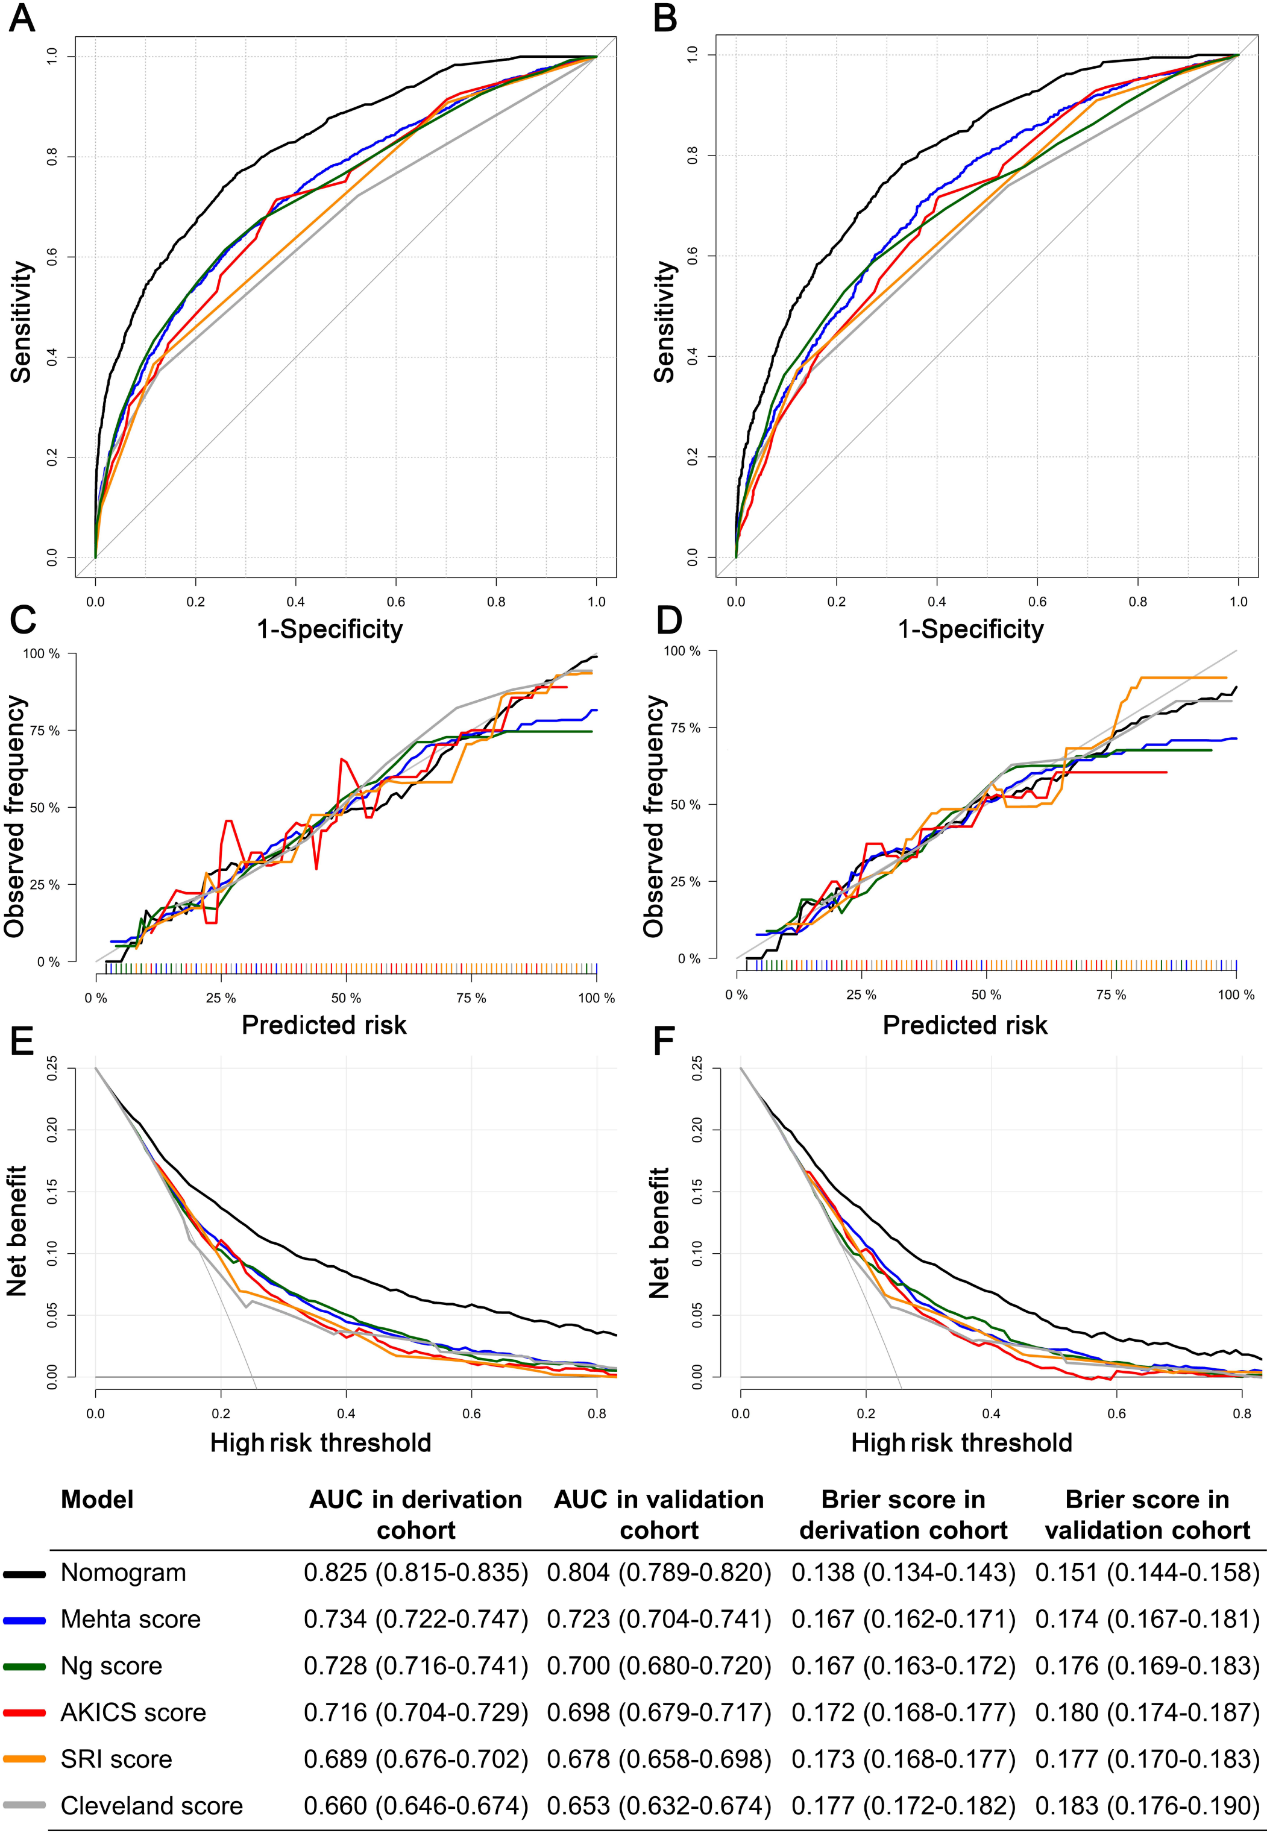


**Figure 2** Comparison of model performance between the nomogram and other five conventional scoring systems. The area under the receiver operating characteristic curve for comparing the nomogram model and other five conventional models in the derivation (**A**) and validation (**B**) cohorts; The calibration curves for comparing the nomogram model and other five conventional models in the derivation (**C**) and validation (**D**) cohorts; The decision curve analysis for comparing the nomogram model and other five conventional models in the derivation (**E**) and validation (**F**) cohorts.


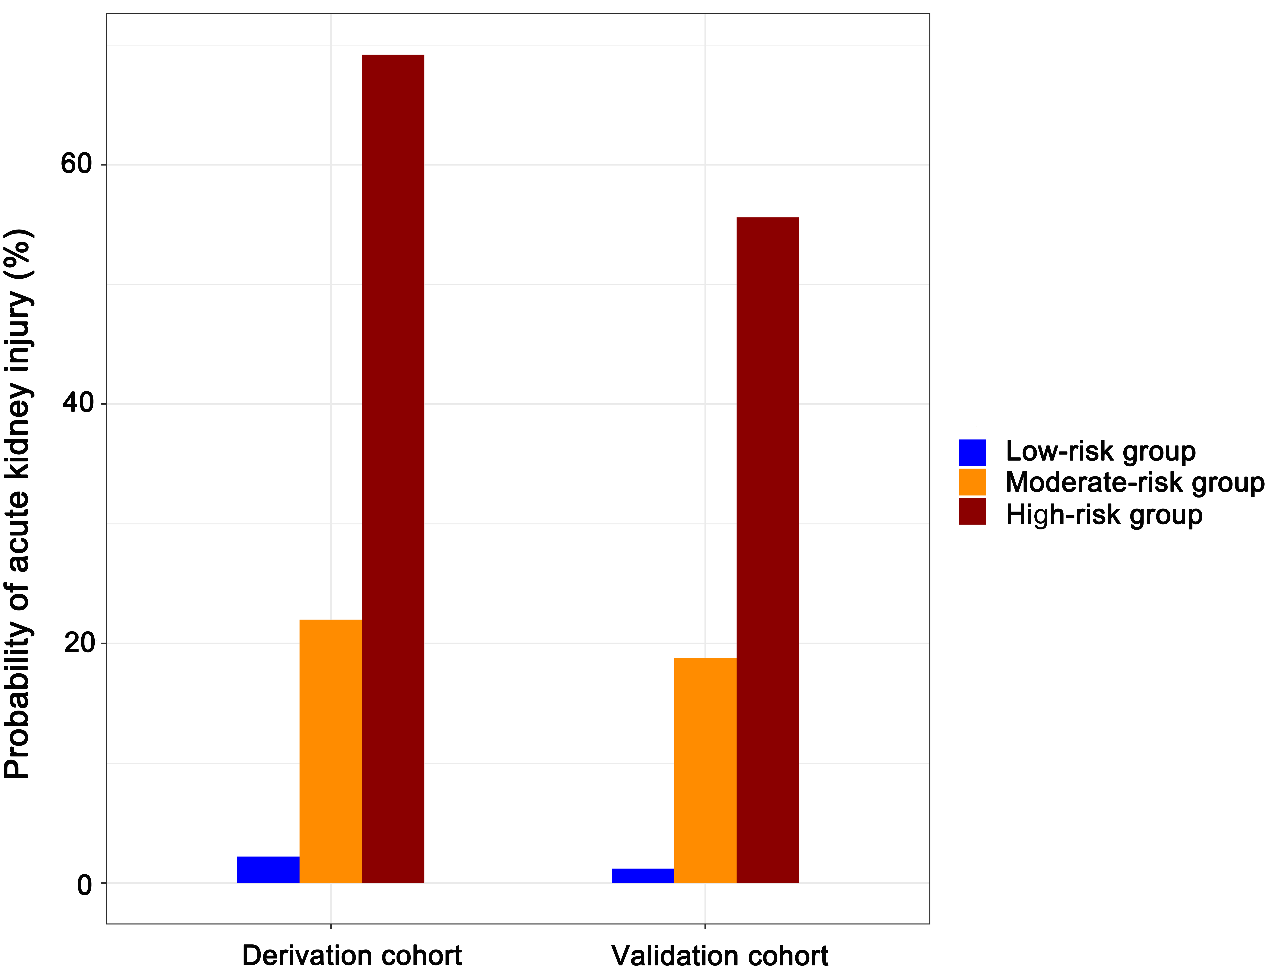


**Figure 3** Risk stratification by the score generated from the nomogram

**Table 1** Variable definition in the databases

| Variable | Definition |
| --- | --- |
| Age | - |
| Male | - |
| Body mass index | Calculate with the use of the formula: weight (kg)/height2 (m2) |
| Center location | I, II, and III represent the centers located in cities which have a population size of <500 million, 500-1000 million, and >1000 million, respectively. |
| Rural area | - |
| Non-insurance | - |
| Smoker | Current and former smoker |
| Diabetes mellitus | Fasting blood glucose ≥126 mg/dL, or 2-hour post-challenge serum glucose ≥200 mg/dL, or use of insulin, or oral hypoglycemic agents |
| Hyperlipidemia | (I) serum total cholesterol >5.2 mmol/L or triglycerides >1.70 mmol/L; (II) self-reported physician diagnosed hyperlipidemia or taking specific treatment for previously diagnosed hyperlipidemia |
| Hypertension | Blood pressure ≥140 mmHg (systolic) or 90 mmHg (diastolic), or on antihypertensive drugs |
| Chronic kidney disease | Hypertensive renal disease, diabetic nephropathy, primary glomerulonephritis, nephrotic syndrome, or other chronic kidney disease with eGFR <60 mL/min/1.73 m2, lasting more than three months. |
| Peripheral vascular disease | Claudication or asymptomatic iliac/femoral artery stenosis >50% |
| Chronic obstructive pulmonary disease | FEV1/FVC <70% after using a bronchodilator, together with an obstructive pattern of breathlessness |
| Pleural effusion | - |
| Cerebrovascular accident | Previous transient ischemic attack, or stroke |
| Critical preoperative state | - |
| Infective endocarditis | Acute or subacute infective endocarditis |
| Angina | - |
| Prior myocardial infarction | Determined by abnormal electrical signals detected in the electrocardiogram, or common blood tests (myoglobin, troponin, and creatine kinase), or drug history |
| NYHA III-IV | According to New York Heart Association |
| Atrial fibrillation | Measured by routine or 24-hour Holter electrocardiogram, or on drug treatment |
| Prior percutaneous coronary intervention | - |
| Serum creatinine | - |
| Hepatic insufficiency | An increase of alanine aminotransferase (>80U/L) and bilirubin (>12mg/dL) in blood, with abnormal function of synthesis and metabolism |
| Carotid stenosis >50% | Measured by vascular ultrasound |
| Pulmonary hypertension | Defined by a pulmonary arterial systolic pressure ≥35 mmHg, with assessing peak tricuspid regurgitation velocity using 2-dimensional echocardiography |
| Moderate to severe valve insufficiency | - |
| Number of diseased coronary vessels | - |
| Left main disease | Left main artery stenosis >50% |
| Medication | - |
| Previous open cardiac surgery | - |
| Non-elective surgery | The duration from hospital admission to operation ≤24 hours |
| Minimally invasive approach | - |
| Surgery type | - |
| Surgeon experience | - |
| Cardiopulmonary bypass time | - |
| Myocardial protection | Myocardial protection technique during cardiopulmonary bypass |
| Intra-aortic balloon pump | - |
| Intraoperative transfusion | - |
| Prolonged mechanical ventilation | A duration of postoperative mechanical ventilation or reintubation >24 hours |
| Reoperation for bleeding | Reoperation for bleeding within 24 hour of intensive care unit admission |

NYHA: New York Heart Association.

**Table 2** Clinical characteristics of derivation and validation cohort

| Variable | Total  (n=11740) | Derivation  (n=8197) | Validation  (n=3543) | P  value* |
| --- | --- | --- | --- | --- |
| Age, years |  |  |  | 0.228 |
| <60 | 4202 (35.8) | 2919 (35.6) | 1283 (36.2) |  |
| 60-69 | 4590 (39.1) | 3245 (39.6) | 1345 (38.0) |  |
| ≥70 | 2948 (25.1) | 2033 (24.8) | 915 (25.8) |  |
| Male | 7485 (63.8) | 5236 (63.9) | 2249 (63.5) | 0.679 |
| Body mass index, kg/m2 |  |  |  | 0.825 |
| <18.5 | 5518 (47.0) | 3866 (47.2) | 1652 (46.6) |  |
| 18.5-23.9 | 464 (3.9) | 320 (3.9) | 144 (4.1) |  |
| ≥24.0 | 5758 (49.0) | 4011 (48.9) | 1747 (49.3) |  |
| Centre location |  |  |  | 0.567 |
| I | 417 (3.6) | 284 (3.5) | 133 (3.8) |  |
| II | 9701 (82.6) | 6767 (82.6) | 2934 (82.8) |  |
| III | 1622 (13.8) | 1146 (14.0) | 476 (13.4) |  |
| Rural area | 6815 (58.0) | 4791 (58.4) | 2024 (57.1) | 0.183 |
| Non-insurance | 2101 (17.9) | 1495 (18.2) | 606 (17.1) | 0.141 |
| Smoker | 2291 (19.5) | 1598 (19.5) | 693 (19.6) | 0.935 |
| Diabetes mellitus |  |  |  | 0.656 |
| No history | 9202 (78.4) | 6429 (78.4) | 2773 (78.3) |  |
| NIDDM | 1922 (16.4) | 1330 (16.2) | 592 (16.7) |  |
| IDDM | 616 (5.3) | 438 (5.3) | 178 (5.0) |  |
| Hyperlipidemia | 1557 (13.3) | 1098 (13.4) | 459 (13.0) | 0.519 |
| Hypertension | 6033 (51.4) | 4209 (51.3) | 1824 (51.5) | 0.894 |
| Chronic kidney disease | 372 (3.2) | 269 (3.3) | 103 (2.9) | 0.288 |
| Peripheral vascular disease | 231 (2.0) | 158 (1.9) | 73 (2.1) | 0.634 |
| COPD | 357 (3.0) | 245 (3.0) | 112 (3.2) | 0.618 |
| Pleural effusion | 494 (4.2) | 370 (4.5) | 124 (3.5) | 0.012 |
| Cerebrovascular accident | 1041 (8.9) | 742 (9.1) | 299 (8.4) | 0.284 |
| Critical preoperative state | 528 (4.5) | 364 (4.4) | 164 (4.6) | 0.652 |
| Infective endocarditis | 565 (4.8) | 391 (4.8) | 174 (4.9) | 0.743 |
| Angina | 4081 (34.8) | 2824 (34.5) | 1257 (35.5) | 0.284 |
| Prior myocardial infarction | 3019 (25.7) | 2080 (25.4) | 939 (26.5) | 0.199 |
| NYHA III-IV | 5285 (45.0) | 3664 (44.7) | 1621 (45.8) | 0.293 |
| Atrial fibrillation | 2361 (20.1) | 1635 (19.9) | 726 (20.5) | 0.499 |
| Prior PCI | 780 (6.6) | 544 (6.6) | 236 (6.7) | 0.961 |
| Serum creatinine, mg/dL |  |  |  | 0.825 |
| <1.2 | 10550 (89.9) | 7359 (89.8) | 3191 (90.1) |  |
| 1.2-2.0 | 979 (8.3) | 687 (8.4) | 292 (8.2) |  |
| >2.0 | 211 (1.8) | 151 (1.8) | 60 (1.7) |  |
| Hepatic insufficiency | 802 (6.8) | 576 (7.0) | 226 (6.4) | 0.201 |
| Carotid stenosis >50% |  |  |  | 0.661 |
| None | 10854 (92.5) | 7567 (92.3) | 3287 (92.8) |  |
| Unilateral | 388 (3.3) | 274 (3.3) | 114 (3.2) |  |
| Bilateral | 498 (4.2) | 356 (4.3) | 142 (4.0) |  |
| Pulmonary hypertension | 1393 (11.9) | 968 (11.8) | 425 (12.0) | 0.774 |
| Moderate to severe valve insufficiency |  |  |  |  |
| Aortic valve | 3582 (30.5) | 2478 (30.2) | 1104 (31.2) | 0.315 |
| Mitral valve | 4844 (41.3) | 3378 (41.2) | 1466 (41.4) | 0.866 |
| Tricuspid valve | 3276 (27.9) | 2267 (27.7) | 1009 (28.5) | 0.362 |
| Number of diseased coronary vessels |  |  |  | 0.199 |
| None | 5584 (47.6) | 3894 (47.5) | 1690 (47.7) |  |
| 1 | 818 (7.0) | 548 (6.7) | 270 (7.6) |  |
| 2 | 763 (6.5) | 526 (6.4) | 237 (6.7) |  |
| 3 | 4575 (39.0) | 3229 (39.4) | 1346 (38.0) |  |
| Left main disease | 2238 (19.1) | 1562 (19.1) | 676 (19.1) | 0.976 |
| Medication |  |  |  |  |
| Nitrates (ivvp) | 770 (6.6) | 539 (6.6) | 231 (6.5) | 0.911 |
| Dopamine (ivvp) | 397 (3.4) | 265 (3.2) | 132 (3.7) | 0.175 |
| Metoprolol | 3199 (27.2) | 2209 (26.9) | 990 (27.9) | 0.267 |
| ACEI | 1058 (9.0) | 749 (9.1) | 309 (8.7) | 0.470 |
| Statins | 2819 (24.0) | 1982 (24.2) | 837 (23.6) | 0.518 |
| Aspirin | 1036 (8.8) | 721 (8.8) | 315 (8.9) | 0.868 |
| Clopidogrel | 573 (4.9) | 388 (4.7) | 185 (5.2) | 0.260 |
| Previous open cardiac surgery | 223 (1.9) | 155 (1.9) | 68 (1.9) | 0.918 |
| Non-elective surgery | 132 (1.1) | 89 (1.1) | 43 (1.2) | 0.546 |
| Minimally invasive approach | 378 (3.2) | 250 (3.1) | 128 (3.6) | 0.113 |
| Surgery type |  |  |  | 0.030 |
| CABG alone | 5011 (42.7) | 3517 (42.9) | 1494 (42.2) |  |
| Valve surgery alone | 5103 (43.5) | 3590 (43.8) | 1513 (42.7) |  |
| Combined surgery | 1626 (13.9) | 1090 (13.3) | 536 (15.1) |  |
| Surgeon experience, years |  |  |  | 0.010 |
| <5 | 498 (4.2) | 368 (4.5) | 130 (3.7) |  |
| 5-10 | 2153 (18.3) | 1456 (17.8) | 697 (19.7) |  |
| >10 | 9089 (77.4) | 6373 (77.7) | 2716 (76.7) |  |
| Cardiopulmonary bypass time, min |  |  |  | 0.291 |
| None | 1922 (16.4) | 1369 (16.7) | 553 (15.6) |  |
| 1-120 | 6495 (55.3) | 4529 (55.3) | 1966 (55.5) |  |
| >120 | 3323 (28.3) | 2299 (28.0) | 1024 (28.9) |  |
| Myocardial protection |  |  |  |  |
| Cardioplegic solution |  |  |  | 0.139 |
| None | 1922 (16.4) | 1369 (16.7) | 553 (15.6) |  |
| Blood | 9584 (81.6) | 6656 (81.2) | 2928 (82.6) |  |
| Crystalloid | 234 (2.0) | 172 (2.1) | 62 (1.8) |  |
| Perfusion strategy I |  |  |  | 0.316 |
| None | 1922 (16.4) | 1369 (16.7) | 553 (15.6) |  |
| Antegrade | 8829 (75.2) | 6135 (74.8) | 2694 (76.0) |  |
| Retrograde or a combination of both | 989 (8.4) | 693 (8.5) | 296 (8.4) |  |
| Perfusion strategy II |  |  |  | 0.159 |
| None | 1922 (16.4) | 1369 (16.7) | 553 (15.6) |  |
| Intermittent | 9571 (81.5) | 6665 (81.3) | 2906 (82.0) |  |
| Continuous | 247 (2.1) | 163 (2.0) | 84 (2.4) |  |
| Intra-aortic balloon pump | 219 (1.9) | 154 (1.9) | 65 (1.8) | 0.871 |
| Intraoperative transfusion |  |  |  |  |
| Red blood cell | 1529 (13.0) | 1071 (13.1) | 458 (12.9) | 0.837 |
| Plasma | 1120 (9.5) | 793 (9.7) | 327 (9.2) | 0.451 |
| Cryoprecipitate | 940 (8.0) | 648 (7.9) | 292 (8.2) | 0.538 |
| Platelet | 1306 (11.1) | 903 (11.0) | 403 (11.4) | 0.571 |
| Prolonged mechanical ventilation | 1799 (15.3) | 1237 (15.1) | 562 (15.9) | 0.287 |
| Reoperation for bleeding | 294 (2.5) | 211 (2.6) | 83 (2.3) | 0.461 |
| Acute kidney injury | 3237 (27.6) | 2253 (27.5) | 984 (27.8) | 0.749 |

* Comparisons between derivation and validation cohorts. Data are reported as number (percentage). NIDDM: non-insulin-dependent diabetes mellitus; COPD: chronic obstructive pulmonary disease; NYHA: New York Heart Association; PCI: percutaneous coronary intervention; ACEI: angiotensin-converting enzyme inhibitor; CABG: coronary artery bypass grafting.

**Table 3** Clinical characteristics of patients in the derivation and validation sets who did or did not develop acute kidney injury after cardiac surgery

|  | Derivation cohort (n=8197) | | P-value | Validation cohort (n=3543) | | P-value |
| --- | --- | --- | --- | --- | --- | --- |
|  | Non-AKI (n=5944) | AKI (n=2253) |  | Non-AKI (n=2559) | AKI (n=984) |  |
| Age, years |  |  | <0.001 |  |  | <0.001 |
| <60 | 2378 (40.0) | 541 (24.0) |  | 1023 (40.0) | 260 (26.4) |  |
| 60-69 | 2335 (39.3) | 910 (40.4) |  | 983 (38.4) | 362 (36.8) |  |
| ≥70 | 1231 (20.7) | 802 (35.6) |  | 553 (21.6) | 362 (36.8) |  |
| Male | 3687 (62.0) | 1549 (68.8) | <0.001 | 1614 (63.1) | 635 (64.5) | 0.441 |
| Body mass index, kg/m2 |  |  | 0.289 |  |  | 0.105 |
| <18.5 | 2835 (47.7) | 1031 (45.8) |  | 1221 (47.7) | 431 (43.8) |  |
| 18.5-23.9 | 231 (3.9) | 89 (4.0) |  | 100 (3.9) | 44 (4.5) |  |
| ≥24.0 | 2878 (48.4) | 1133 (50.3) |  | 1238 (48.4) | 509 (51.7) |  |
| Centre location |  |  | <0.001 |  |  | 0.018 |
| I | 219 (3.7) | 65 (2.9) |  | 106 (4.1) | 27 (2.7) |  |
| II | 4841 (81.4) | 1926 (85.5) |  | 2092 (81.8) | 842 (85.6) |  |
| III | 884 (14.9) | 262 (11.6) |  | 361 (14.1) | 115 (11.7) |  |
| Rural area | 3499 (58.9) | 1292 (57.3) | 0.222 | 1455 (56.9) | 569 (57.8) | 0.629 |
| Non-insurance | 1064 (17.9) | 431 (19.1) | 0.209 | 465 (18.2) | 141 (14.3) | 0.008 |
| Smoker | 1108 (18.6) | 490 (21.7) | 0.002 | 503 (19.7) | 190 (19.3) | 0.852 |
| Diabetes mellitus |  |  | <0.001 |  |  | <0.001 |
| No history | 4850 (81.6) | 1579 (70.1) |  | 2080 (81.3) | 693 (70.4) |  |
| NIDDM | 870 (14.6) | 460 (20.4) |  | 378 (14.8) | 214 (21.7) |  |
| IDDM | 224 (3.8) | 214 (9.5) |  | 101 (3.9) | 77 (7.8) |  |
| Hyperlipidemia | 775 (13.0) | 323 (14.3) | 0.133 | 343 (13.4) | 116 (11.8) | 0.220 |
| Hypertension | 2788 (46.9) | 1421 (63.1) | <0.001 | 1210 (47.3) | 614 (62.4) | <0.001 |
| Chronic kidney disease | 31 (0.5) | 238 (10.6) | <0.001 | 18 (0.7) | 85 (8.6) | <0.001 |
| Peripheral vascular disease | 97 (1.6) | 61 (2.7) | 0.002 | 52 (2.0) | 21 (2.1) | 0.952 |
| COPD | 156 (2.6) | 89 (4.0) | 0.002 | 81 (3.2) | 31 (3.2) | 1.000 |
| Pleural effusion | 239 (4.0) | 131 (5.8) | 0.001 | 84 (3.3) | 40 (4.1) | 0.302 |
| Cerebrovascular accident | 496 (8.3) | 246 (10.9) | <0.001 | 198 (7.7) | 101 (10.3) | 0.018 |
| Critical preoperative state | 106 (1.8) | 258 (11.5) | <0.001 | 68 (2.7) | 96 (9.8) | <0.001 |
| Infective endocarditis | 202 (3.4) | 189 (8.4) | <0.001 | 99 (3.9) | 75 (7.6) | <0.001 |
| Angina | 2091 (35.2) | 733 (32.5) | 0.026 | 930 (36.3) | 327 (33.2) | 0.090 |
| Prior myocardial infarction | 1521 (25.6) | 559 (24.8) | 0.488 | 687 (26.8) | 252 (25.6) | 0.481 |
| NYHA III-IV | 2519 (42.4) | 1145 (50.8) | <0.001 | 1107 (43.3) | 514 (52.2) | <0.001 |
| Atrial fibrillation | 1128 (19.0) | 507 (22.5) | <0.001 | 475 (18.6) | 251 (25.5) | <0.001 |
| Prior PCI | 381 (6.4) | 163 (7.2) | 0.197 | 160 (6.3) | 76 (7.7) | 0.134 |
| Serum creatinine, mg/dL |  |  | <0.001 |  |  | <0.001 |
| <1.2 | 5616 (94.5) | 1743 (77.4) |  | 2399 (93.7) | 792 (80.5) |  |
| 1.2-2.0 | 315 (5.3) | 372 (16.5) |  | 150 (5.9) | 142 (14.4) |  |
| >2.0 | 13 (0.2) | 138 (6.1) |  | 10 (0.4) | 50 (5.1) |  |
| Hepatic insufficiency | 429 (7.2) | 147 (6.5) | 0.295 | 177 (6.9) | 49 (5.0) | 0.042 |
| Carotid stenosis >50% |  |  | <0.001 |  |  | 0.309 |
| None | 5528 (93.0) | 2039 (90.5) |  | 2384 (93.2) | 903 (91.8) |  |
| Unilateral | 172 (2.9) | 102 (4.5) |  | 76 (3.0) | 38 (3.9) |  |
| Bilateral | 244 (4.1) | 112 (5.0) |  | 99 (3.9) | 43 (4.4) |  |
| Pulmonary hypertension | 672 (11.3) | 296 (13.1) | 0.024 | 283 (11.1) | 142 (14.4) | 0.007 |
| Moderate to severe valve insufficiency |  |  |  |  |  |  |
| Aortic valve | 1706 (28.7) | 772 (34.3) | <0.001 | 746 (29.2) | 358 (36.4) | <0.001 |
| Mitral valve | 2275 (38.3) | 1103 (49.0) | <0.001 | 985 (38.5) | 481 (48.9) | <0.001 |
| Tricuspid valve | 1572 (26.4) | 695 (30.8) | <0.001 | 679 (26.5) | 330 (33.5) | <0.001 |
| Number of diseased coronary vessels |  |  | 0.113 |  |  | 0.087 |
| None | 2862 (48.1) | 1032 (45.8) |  | 1200 (46.9) | 490 (49.8) |  |
| 1 | 378 (6.4) | 170 (7.5) |  | 194 (7.6) | 76 (7.7) |  |
| 2 | 375 (6.3) | 151 (6.7) |  | 162 (6.3) | 75 (7.6) |  |
| 3 | 2329 (39.2) | 900 (39.9) |  | 1003 (39.2) | 343 (34.9) |  |
| Left main disease | 1179 (19.8) | 383 (17.0) | 0.004 | 526 (20.6) | 150 (15.2) | <0.001 |
| Medication |  |  |  |  |  |  |
| Nitrates (ivvp) | 367 (6.2) | 172 (7.6) | 0.020 | 165 (6.4) | 66 (6.7) | 0.838 |
| Dopamine (ivvp) | 176 (3.0) | 89 (4.0) | 0.028 | 89 (3.5) | 43 (4.4) | 0.247 |
| Metoprolol | 1582 (26.6) | 627 (27.8) | 0.281 | 729 (28.5) | 261 (26.5) | 0.261 |
| ACEI | 545 (9.2) | 204 (9.1) | 0.907 | 241 (9.4) | 68 (6.9) | 0.021 |
| Statins | 1461 (24.6) | 521 (23.1) | 0.179 | 650 (25.4) | 187 (19.0) | <0.001 |
| Aspirin | 551 (9.3) | 170 (7.5) | 0.016 | 252 (9.8) | 63 (6.4) | 0.002 |
| Clopidogrel | 293 (4.9) | 95 (4.2) | 0.194 | 148 (5.8) | 37 (3.8) | 0.019 |
| Previous open cardiac surgery | 114 (1.9) | 41 (1.8) | 0.841 | 43 (1.7) | 25 (2.5) | 0.125 |
| Non-elective surgery | 45 (0.8) | 44 (2.0) | <0.001 | 21 (0.8) | 22 (2.2) | 0.001 |
| Minimally invasive approach | 196 (3.3) | 54 (2.4) | 0.041 | 104 (4.1) | 24 (2.4) | 0.026 |
| Surgery type |  |  | <0.001 |  |  | <0.001 |
| CABG alone | 2885 (48.5) | 632 (28.1) |  | 1224 (47.8) | 270 (27.4) |  |
| Valve surgery alone | 2644 (44.5) | 946 (42.0) |  | 1098 (42.9) | 415 (42.2) |  |
| Combined surgery | 415 (7.0) | 675 (30.0) |  | 237 (9.3) | 299 (30.4) |  |
| Surgeon experience, years |  |  | 0.976 |  |  | <0.001 |
| <5 | 266 (4.5) | 102 (4.5) |  | 103 (4.0) | 27 (2.7) |  |
| 5-10 | 1059 (17.8) | 397 (17.6) |  | 540 (21.1) | 157 (16.0) |  |
| >10 | 4619 (77.7) | 1754 (77.9) |  | 1916 (74.9) | 800 (81.3) |  |
| Cardiopulmonary bypass time, min |  |  | <0.001 |  |  | <0.001 |
| None | 1201 (20.2) | 168 (7.5) |  | 478 (18.7) | 75 (7.6) |  |
| 1-120 | 3435 (57.8) | 1094 (48.6) |  | 1474 (57.6) | 492 (50.0) |  |
| >120 | 1308 (22.0) | 991 (44.0) |  | 607 (23.7) | 417 (42.4) |  |
| Myocardial protection |  |  |  |  |  |  |
| Cardioplegic solution |  |  | <0.001 |  |  | <0.001 |
| None | 1201 (20.2) | 168 (7.5) |  | 478 (18.7) | 75 (7.6) |  |
| Blood | 4651 (78.2) | 2005 (89.0) |  | 2041 (79.8) | 887 (90.1) |  |
| Crystalloid | 92 (1.5) | 80 (3.6) |  | 40 (1.6) | 22 (2.2) |  |
| Perfusion strategy I |  |  | <0.001 |  |  | <0.001 |
| None | 1201 (20.2) | 168 (7.5) |  | 478 (18.7) | 75 (7.6) |  |
| Antegrade | 4288 (72.1) | 1847 (82.0) |  | 1891 (73.9) | 803 (81.6) |  |
| Retrograde or a combination of both | 455 (7.7) | 238 (10.6) |  | 190 (7.4) | 106 (10.8) |  |
| Perfusion strategy II |  |  | <0.001 |  |  | <0.001 |
| None | 1195 (20.1) | 174 (7.7) |  | 478 (18.7) | 75 (7.6) |  |
| Intermittent | 4656 (78.3) | 2009 (89.2) |  | 2034 (79.5) | 872 (88.6) |  |
| Continuous | 93 (1.6) | 70 (3.1) |  | 47 (1.8) | 37 (3.8) |  |
| Intra-aortic balloon pump | 29 (0.5) | 125 (5.5) | <0.001 | 23 (0.9) | 42 (4.3) | <0.001 |
| Intraoperative transfusion |  |  |  |  |  |  |
| Red blood cell | 520 (8.7) | 551 (24.5) | <0.001 | 230 (9.0) | 228 (23.2) | <0.001 |
| Plasma | 460 (7.7) | 333 (14.8) | <0.001 | 189 (7.4) | 138 (14.0) | <0.001 |
| Cryoprecipitate | 413 (6.9) | 235 (10.4) | <0.001 | 188 (7.3) | 104 (10.6) | 0.002 |
| Platelet | 634 (10.7) | 269 (11.9) | 0.109 | 284 (11.1) | 119 (12.1) | 0.437 |
| Prolonged mechanical ventilation | 570 (9.6) | 667 (29.6) | <0.001 | 263 (10.3) | 299 (30.4) | <0.001 |
| Reoperation for bleeding | 102 (1.7) | 109 (4.8) | <0.001 | 40 (1.6) | 43 (4.4) | <0.001 |

Data are reported as number (percentage). NIDDM: non-insulin-dependent diabetes mellitus; COPD: chronic obstructive pulmonary disease; NYHA: New York Heart Association; PCI: percutaneous coronary intervention; ACEI: angiotensin-converting enzyme inhibitor; CABG: coronary artery bypass grafting.

**Table 4** Detailed comparison between nomogram and other five conventional scoring systems

| Item | Nomogram | AKICS score | Mehta score | Cleveland Clinic score | SRI score | Ng score |
| --- | --- | --- | --- | --- | --- | --- |
| Surgery type | CABG, valve surgery, or both | CABG, valve surgery, or both | CABG, valve surgery, or both | All cardiac surgery | CABG, valve surgery, or both | All cardiac surgery |
| End point | AKI | AKI | RRT-AKI | RRT-AKI | RRT-AKI | AKI |
| Center | Multi-center | Single-center | Multi-center | Single-center | Single-center | Multi-center |
| Study years | 2013-2020 | 2003-2006 | 2005 | 1993-2002 | 1999-2005 | 2001-2009 |
| Number in derivation cohort | 8197 | 603 | 449524 | 15838 | 10751 | 17095 |
| Number in validation cohort | 3543 | 215 | 86009 | 15839 | 2566, 6814 | 11327 |
| AUC in derivation cohort | 0.825 | 0.843 | 0.83 | 0.81 | 0.81 | 0.82 |
| AUC in validation cohort | 0.804 | 0.847 | 0.83 | 0.82 | 0.78, 0.78 | 0.81 |
| Predictors of the nomogram | | | | | | |
| Age | √ | √ | √ | √ | - | √ |
| Diabetes mellitus | √ | √ | √ | √ | √ | √ |
| Hypertension | √ | - | - | - | - | - |
| Chronic kidney disease | √ | - | - | - | - | - |
| Critical preoperative state | √ | - | √ | √ | √ | √ |
| Infective endocarditis | √ | - | - | - | - | - |
| Serum creatinine | √ | √ | √ | √ | - | √ |
| Surgery type | √ | √ | √ | √ | √ | √ |
| Cardiopulmonary bypass time | √ | √ | - | - | - | √ |
| Intra-aortic balloon pump | √ | √ | - | - | √ | √ |
| Intraoperative red blood cell transfusion | √ | - | - | - | - | √ |
| Prolonged mechanical ventilation | √ | - | - | - | - | - |

CABG: coronary artery bypass grafting; AKI: acute kidney injury; RRT: renal replacement therapy; AUC: area under the receiver operating characteristic curve.

**Table 5** Percentage of patients in risk category

|  | Total cohort (n=11740) | Derivation cohort (n=8197) | Validation cohort (3543) |
| --- | --- | --- | --- |
| Low-risk group | 1514 (12.9) | 1096 (13.4) | 418 (11.8) |
| Moderate-risk group | 7495 (63.8) | 5434 (66.3) | 2061 (58.2) |
| High-risk group | 2731 (23.3) | 1667 (20.3) | 1064 (30.0) |

Data are reported as number (percentage).
